# Supplementary material
Source: PubMed Central journal article supplement (PMC5199620)
Supplement: NIHMS835927-supplement-Protocols.pdf [file NIHMS835927-supplement-Protocols.pdf]

## **Supplementary Protocols**

### **A. Expression of cNWs proteins in *E. coli***

- 1) Transform 20  $\mu$ l *E. coli* BL21-Gold (DE3) cells (or derivatives) with 20 ng of pET28a-NWs plasmid DNA.
- 2) Plate the cells on LB agar plate containing 50  $\mu$ g/mL Kanamycin and grow colonies at 37°C overnight.
- 3) Inoculate a colony into a sterile flask containing 70 mL LB supplemented with 50  $\mu$ g/mL Kanamycin.
- 4) Grow seed culture overnight at 37°C, shaking at 200 rpm.
- 5) Inoculate 6L LB medium supplemented with 50  $\mu$ g/mL Kanamycin and shake at 200 rpm at 37°C until OD<sub>600</sub> reaches 0.6.
- 6) Induce at OD<sub>600</sub> of 0.6 with 1 mM IPTG (1 M stock in H<sub>2</sub>O, filtered).
- 7) Grow cells for another 3 hours at 37°C (for NW9 and NW11) or another 16 hours at 18°C (for NW30 and NW50).
- 8) Harvest cells by centrifugation (7000xg, 15 minutes, 4°C).
- 9) Remove supernatant and store cell pellet at -80°C.

### **B. Purification of NW9 and NW11**

- 1) Thaw cells at room temperature (RT) for 40 minutes then resuspend in 5 mL of lysis buffer (50 mM Tris-HCl, pH 8.0, 500 mM NaCl, 1 % Triton X-100) per gram of cell. Make sure you add one protease inhibitor cocktail tablet per 50 ml of cell suspension. Sometimes, we supplement lysis buffer with 1 mM EDTA In addition to the protease inhibitor tablet (optional).
- 2) Add ~1 mg lysozyme per mL of cell suspension
- 3) Stir in the cold room for 30-40 minutes.
- 4) Sonicate cells on ice (20 min net sonication, 30% duty cycle, 1 second on - 3 seconds off)
- 5) Add 5 mM MgCl<sub>2</sub> (if you supplemented the lysis buffer with EDTA) and 100U Benzonase Nuclease then stir on ice or at 4°C for 45 minutes.
- 6) Spin down cell debris and insoluble materials at 35000 g and 4°C for 50 min.

- 7) Apply (3 times) supernatant to Ni-NTA column equilibrated with 50 mM Tris-HCl, pH 8.0, 500 mM NaCl (= buffer A) +1 % Triton X-100.
- 8) Wash with 10 column volumes (CV) buffer A+ 1% TritonX-100.
- 9) Wash with 10 CV buffer A + 50 mM Cholate.
- 10) Wash with 10 CV buffer A
- 11) Wash with 10 CV buffer A + 20 mM imidazole.
- 12) Elute protein with 3-5 CV buffer A+ 500 mM imidazole
- 13) Check protein purity with SDS-PAGE then dialyze against 50 mM Tris-HCl, pH 8.0, 100 mM NaCl using a 12-14 kD MWCO membrane.
- 14) Add 2 mM DTT and TEV protease (His6-tagged; produced in-house), incubate at 4°C for ~ 8-16 hours. Add TEV at a protease to NW protein ratio of 1: 50 (w/w).
- 15) Run SDS-PAGE to make sure the N- terminal His tag cleavage is complete.
- 16) After TEV cleavage is complete, concentrate up to 500-600  $\mu$ M, flash freeze and store at -80°C. Alternatively, move on directly to the circularization reaction (preferred).

#### Optional

As a lot of NW9 and NW11 proteins can be found in the insoluble fraction after cell lysis, we perform purification under denaturing conditions as follows;

- 1) Dissolve the pellet in 6 M guanidine hydrochloride (Gn-HCl), 50 mM Tris-HCl, pH 8.0, 500 mM NaCl.
- 2) Centrifuge (35000 g, 50 min, 4°C) to remove insoluble debris.
- 3) Apply (3 times) onto NiNTA equilibrated with 6 M Gn-HCl buffer
- 4) Wash with 10 CV 6 M Gn-HCl buffer
- 5) Wash with 10 CV buffer A to refold the NW9 and NW11 on the NiNTA column.
- 6) Wash with buffer A + Triton X-100, buffer A + cholate, buffer A, and buffer A + 20 mM Imidazole as described above in the standard protocol.
- 7) Elute with buffer A + 500 mM Imidazole.
- 8) Perform dialyses and TEV cleavage as mentioned above.

#### **C. Purification of NW30 and NW50**

NW30 and NW50 were purified under denaturing conditions and refolded as follows:

- 1) Dissolve the cell pellet in 6 M Gn-HCl, 50 mM Tris-HCl, pH 8.0, 500 mM NaCl.
- 2) Centrifuge (35000 g, 50 min, 4°C) to remove insoluble debris.
- 3) Apply (3 times) onto NiNTA equilibrated with 6 M Gn-HCl buffer
- 4) Wash with 10 CV 6 M Gn-HCl buffer.
- 5) Wash with 10 CV buffer A to refold the NW30 and NW50 on the NiNTA column.
- 6) Wash with buffer A + Triton X-100, buffer A + cholate, buffer A, and buffer A + 20 mM Imidazole as described above under section **B** (steps 8-11).
- 7) Elute with buffer A + 500 mM Imidazole.
- 8) Perform dialyses and TEV cleavage as described above under section **B** (steps 13-16).
- 9) NW30 and NW50 (still containing a C-terminal His<sub>6</sub> tag) were further purified by size exclusion chromatography (SEC; Superdex 200 16/60 [GE Healthcare] equilibrated in 20 mM Tris-HCl, pH 7.5, 500 mM NaCl, 50 mM sodium cholate, 0.5 mM EDTA).
- 10) SEC fractions containing NW30 and NW50 were further purified over Ni<sup>2+</sup>-NTA resin to remove truncation products (which lack a C-terminal His<sub>6</sub> tag). (Follow steps 7-13 from section **B**)
- 11) Purified proteins were concentrated, flash frozen and stored at -80°C. Alternatively, move on directly to the circularization reaction (preferred).

#### General Comments about NWs productions.

- In order to minimize the truncation products (for NW30 and NW50), expression is optionally being done at lower temperatures (20°C or below) and an additional His purification step is added after SEC.
- Make sure the TEV reaction is complete before moving on to the next step.
- We do not remove TEV after N terminal His tag cleavage. Instead, we remove it together with the sortase enzyme at a later step.

#### D. MSP circularization

- 1) Dilute the purified proteins into sortase reaction buffer (300 mM Tris-HCl, pH 7.5, 150 mM NaCl, 10 mM CaCl<sub>2</sub>) so that the final NWs concentration is less than 15 µM.

- 2) Add freshly made evolved sortase (Addgene plasmid # 75144) so that the final sortase: protein molar ratio is 1: 2. Continue incubation at 37°C while stirring for 3-4 hours (preferred) or at 4°C overnight.
- 3) Monitor the reaction by SDS-PAGE. Take aliquot every 1-hour and mix it with the SDS-PAGE sample buffer.
- 4) Add the covalent sortase inhibitor, AA EK2, to a final concentration of 500 μM once sortase reaction is complete (usually after 3-4 hours at 37°C).
- 5) Incubate the reaction for another 30 min at room temperature while gently shaking.
- 6) Apply (3 times) the reaction mixture onto NiNTA equilibrated with 20 mM Tris-HCl, pH 7.5, 500 mM NaCl buffer. **Please note** that we perform this Ni purification step to remove TEV, sortase, cleaved C-terminal His tag and the un-circularized NWs. We recommend that you use excess Ni resin in this step.
- 7) Wash with 3 CV of buffer containing 20 mM Tris-HCl, pH 7.5, 500 mM NaCl, 10 mM imidazole.
- 8) Combine flow-through and wash fractions (containing the circularized products) then add 50-100 mM EDTA (optional).
- 9) Concentrate the circularized products using centricon concentrators. Use 10 kDa MW cutoff concentrators for NW9 and NW11, and use 30 and 50 kDa MW cutoff for NW30 and NW50 respectively.
- 10) Inject cNWs into a Superdex 75 16/60 column equilibrated in buffer containing 20 mM Tris-HCl, pH 7.5, 500 mM NaCl plus 50 mM sodium cholate or 1 mM dodecyl-β-D-maltoside (DDM).
- 11) Collect fractions containing cNWs and check the purity using SDS-PAGE.
- 12) Exchange the buffer into buffer A<sub>ix</sub> (20 mM Tris, pH 8.2, 1 mM DDM) using centricon concentrators or dialysis.
- 13) Concentrate the protein solution then apply it to a Resource Q column equilibrated with buffer A<sub>ix</sub>. A linear salt gradient from 0-60 % buffer B<sub>ix</sub> (20 mM Tris, pH 8.2, 1 mM DDM, 1M NaCl) was applied. Circularized proteins usually elute around 150-200 mM NaCl.
- 14) Collect the fractions containing cNWs and concentrate. Use fresh preparation to make nanodiscs (preferred) or store at -80°C for future use.

### **E. Example of nanodiscs assembly reaction using circularized NW9 (cNW9)**

$$V = 300 \mu\text{L}$$

- 135  $\mu\text{L}$  of 20 mM Tris-HCl, pH 7.5, 100 mM NaCl, 70 mM sodium cholate buffer. Final cholate concentration: 31.5 mM.
- 45  $\mu\text{L}$  POPC/POPG (3:2) (80 mM stock)  $\rightarrow$  final concentration: 12 mM.
- 120  $\mu\text{L}$  cNW9 (500  $\mu\text{M}$  stock)  $\rightarrow$  final concentration: 0.2 mM.
- Incubate for 1 hour on ice.
- Add  $\sim$  0.3-0.5 g of wet Biobeads SM-2 and continue incubation over ice for another 30-60 min.
- Shake on orbital shaker for 4-12 h at 4°C.
- Remove Biobeads by filtration (or use the centrifuge tube filters Spin-X (Costar)) and then apply reaction mixture to Superdex 200 size exclusion column.

### **F. Example of nanodiscs assembly reaction using circularized NW11 (cNW11)**

$$V = 300 \mu\text{L}$$

- 159  $\mu\text{L}$  of 20 mM Tris-HCl, pH 7.5, 100 mM NaCl, 60 mM sodium cholate buffer. Final cholate concentration: 31.8 mM.
- 45  $\mu\text{L}$  POPC/POPG (3:2) (80 mM stock)  $\rightarrow$  final concentration: 12 mM.
- 96  $\mu\text{L}$  cNW11 (500  $\mu\text{M}$  stock)  $\rightarrow$  final concentration: 0.16 mM.
- Incubate for 1 hour on ice.
- Add  $\sim$  0.3-0.5 g of wet Biobeads SM-2 and continue incubation over ice for another 30-60 min.
- Shake on orbital shaker for 4-12 h at 4°C.
- Remove Biobeads by filtration and then apply reaction mixture to Superdex 200 size exclusion column.

### **G. Example of nanodiscs assembly reaction using circularized NW30 (cNW30)**

$$V = 300 \mu\text{L}$$

- 175  $\mu\text{L}$  of 20 mM Tris-HCl, pH 7.5, 100 mM NaCl, 60 mM sodium cholate buffer. Final cholate concentration: 35 mM.

- 25  $\mu\text{L}$  POPC/POPG (3:2) (60 mM stock)  $\rightarrow$  final concentration: 5 mM.
- 100  $\mu\text{L}$  cNW30 (100  $\mu\text{M}$  stock)  $\rightarrow$  final concentration: 33.3  $\mu\text{M}$ .
- Incubate for 1 hour on ice.
- Add  $\sim$  0.4-0.5 g of wet Biobeads SM-2 and continue incubation over ice for another 30-60 min.
- Shake on orbital shaker for 3-4 h at 4°C.
- Remove Biobeads by filtration and then apply reaction mixture to Superose 6 size exclusion column.
  - **Please note** that we also performed the assembly reaction successfully in the presence of excess lipids at NW30: lipids ratio of 1:1000 (**Supplementary Figure 7**)

#### **H. Example of nanodiscs assembly reaction using NW50**

$$V = 300 \mu\text{L}$$

- 183  $\mu\text{L}$  of 20 mM Tris-HCl, pH 7.5, 100 mM NaCl, 60 mM sodium cholate buffer. Final cholate concentration: 36.6 mM.
- 42  $\mu\text{L}$  POPC/POPG (3:2) (80 mM stock)  $\rightarrow$  final concentration: 11.25 mM.
- 75  $\mu\text{L}$  cNW50 (10  $\mu\text{M}$  stock)  $\rightarrow$  final concentration: 2.5  $\mu\text{M}$ .
- Incubate for 1 hour on ice.
- Add  $\sim$  0.4-0.5 g of wet Biobeads SM-2 and continue incubation on ice for another 30-60 min.
- Shake on orbital shaker for 3-4 h at 4°C.
- Remove Biobeads by filtration then apply reaction mixture to Superose 6 size exclusion column.
